# Supplementary material
Source: PubMed Central journal article supplement (PMC3153590)
Supplement: NIHMS275478-supplement-1_si_001.pdf [file NIHMS275478-supplement-1_si_001.pdf]

Supporting information for

**Polymer Brush-Modified Magnetic Nanoparticles for His-Tagged Protein  
Purification**

*Fei Xu, James H. Geiger, Gregory L. Baker, and Merlin L. Bruening\**

Department of Chemistry

Michigan State University, East Lansing, MI 48824

E-mail: [bruening@chemistry.msu.edu](mailto:bruening@chemistry.msu.edu). Tel: (517) 355-9715, ext. 237. Fax: (517)

353-1793.

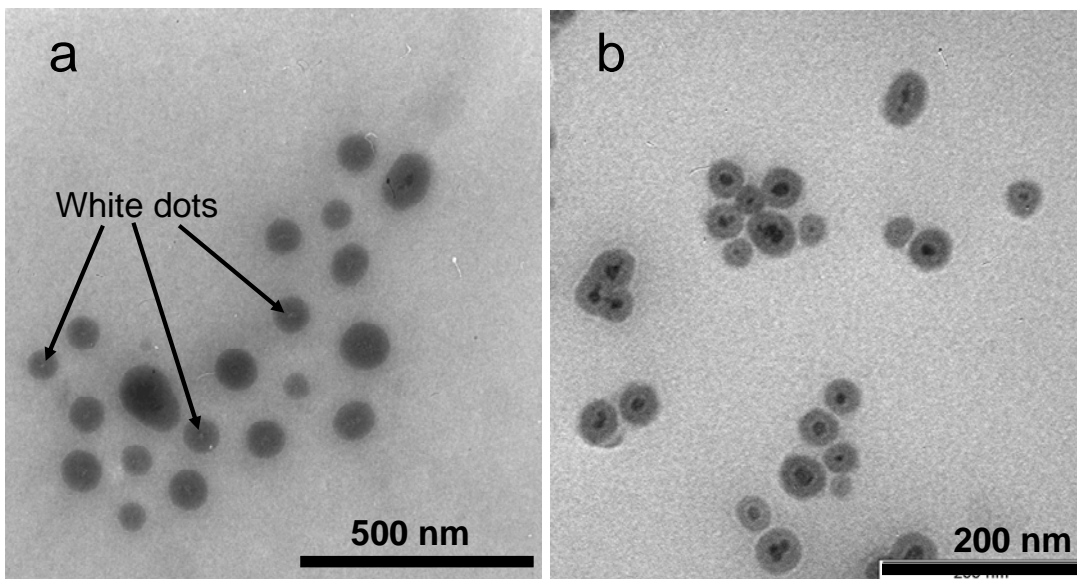

**Figure S1.** TEM images of initiator-modified  $\text{SiO}_2\text{-Fe}_3\text{O}_4$  particles prepared (a) without and (b) with nitrogen bubbling during initiator attachment.

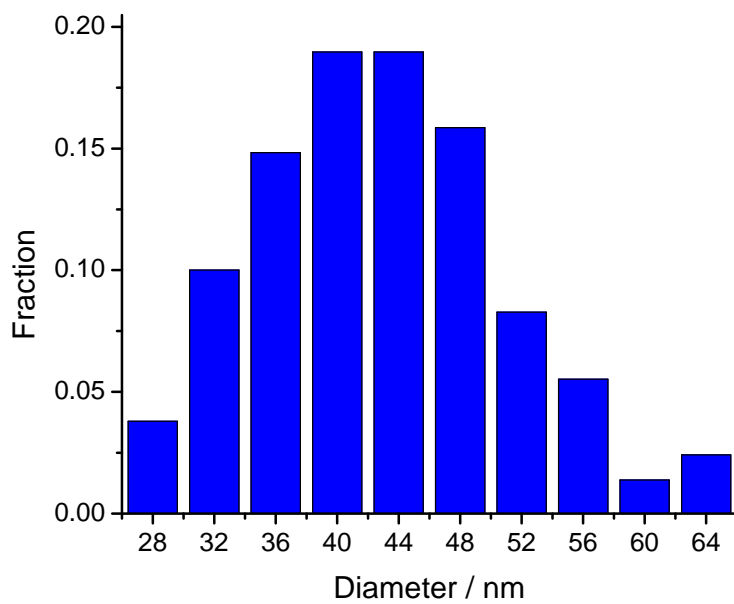

**Figure S2.** Size distribution of  $\text{SiO}_2\text{-Fe}_3\text{O}_4$  particles in TEM images.

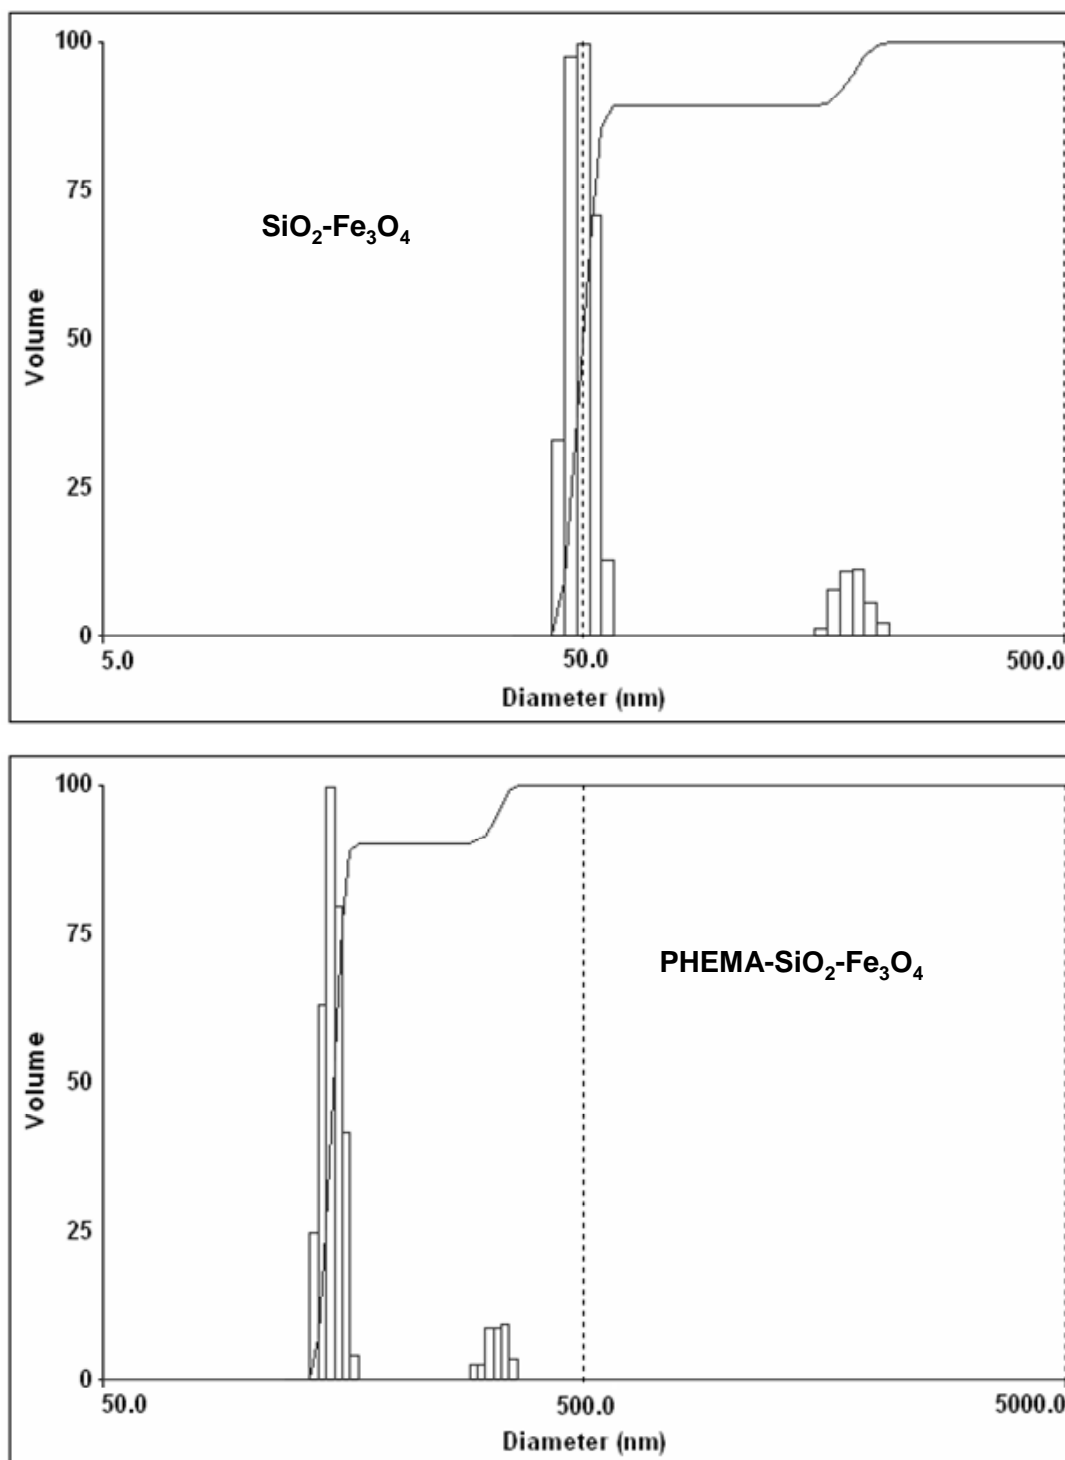

**Figure S3.** Nanoparticle size distribution determined from light scattering data,  $\text{SiO}_2\text{-Fe}_3\text{O}_4$  (top) and PHEMA- $\text{SiO}_2\text{-Fe}_3\text{O}_4$  (bottom).

### Estimation of the Extent of Reaction of PHEMA with SA

To estimate the percent yield of the reaction of PHEMA with SA, suppose we start from 1.00 g of initiator-Silica-MNPs for all samples. TGA analysis shows that such a sample yields approximately 0.89 g of residue. Added polymer and its SA derivatives should completely decompose, so the weight of residue should be constant at 0.89 g for all the samples. To convert the initial mass for a sample of arbitrary mass to a normalized initial mass based on starting from 1.00 g of initiator-Silica-MNPs, we simply divide 0.89 g by the weight fraction remaining after TGA. Subtraction of the 1.00 g of initiator-Silica-MNPs from the normalized initial mass gives the mass of added polymer. Table S1 shows the masses of PHEMA and PHEMA-SA attached to initiator-Silica-MNPs. Based on the molecular masses of PHEMA (130 g/mol) and PHEMA-SA (230 g/mol), the PHEMA and PHEMA-SA masses determined from TGA suggest that the reaction with SA occurs in 105% yield. Thus, the reaction proceeds essentially to completion.

**Table S1.** Calculated Masses (based on TGA) of PHEMA and PHEMA-SA Formed on Initiator-Silica-MNPs. The masses are normalized to samples starting with 1.00 g of initiator-Silica-MNPs with 0.89 g residue remaining.

| sample                | % mass of residue from TGA | Initial Mass of sample/g | Mass of polymer/g |
|-----------------------|----------------------------|--------------------------|-------------------|
| Initiator-Silica-MNPs | 89                         | 1.00                     | 0                 |
| PHEMA-MNPs            | 29                         | 3.1                      | 2.1               |
| SA-PHEMA-MNPs         | 18                         | 4.9                      | 3.9               |

**Estimation of PHEMA thickness from TGA data.**

Scheme S1 illustrates the composition of a PHEMA-SiO<sub>2</sub>-Fe<sub>3</sub>O<sub>4</sub> bead. The thickness of the polymer brushes can be calculated from the mass of PHEMA as follows.

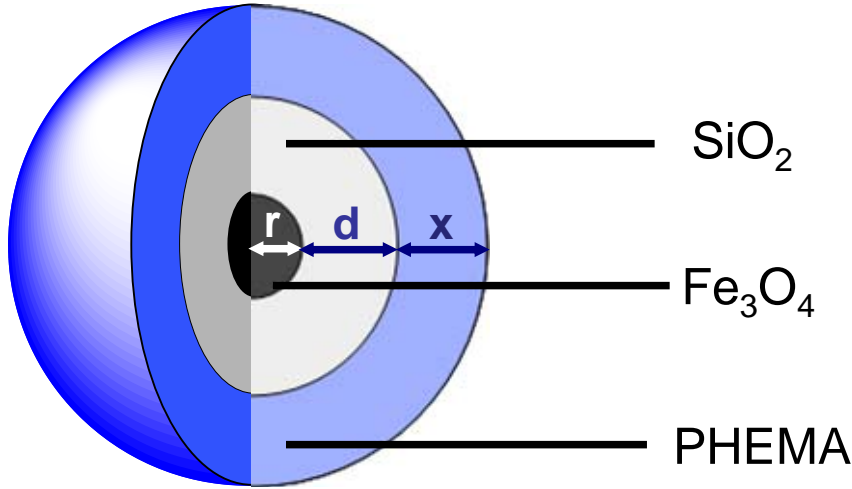

**Scheme S1.** Structure of PHEMA-SiO<sub>2</sub>-Fe<sub>3</sub>O<sub>4</sub>.

Roughly:

Mass(PHEMA)/Mass(initiator+SiO<sub>2</sub>+Fe<sub>3</sub>O<sub>4</sub>) = 2.1 from TGA data in Table S1

Density of polymer ( $\rho_{\text{PHEMA}}$ ): 1.2 mg/cm<sup>3</sup>; thickness: x nm

Density of silica ( $\rho_{\text{SiO}_2}$ ): 2 mg/cm<sup>3</sup>; thickness (d): 16.5 nm

Density of magnetite ( $\rho_{\text{Fe}_3\text{O}_4}$ ): 5 mg/cm<sup>3</sup>; radius (r): 5 nm

Noting that mass equals the production of density,  $\rho$ , and volume, V,

$$\frac{\rho_{\text{PHEMA}} \times V_{\text{PHEMA}}}{\rho_{\text{silica}} \times V_{\text{silica}} + \rho_{\text{Fe}_3\text{O}_4} \times V_{\text{Fe}_3\text{O}_4}} = 2.1$$

Using the formulae for the volumes of spherical shells,

$$\frac{\rho_{\text{PHEMA}} \times \frac{4}{3} \times \pi \times [(x + d + r)^3 - (d + r)^3]}{\rho_{\text{SiO}_2} \times \frac{4}{3} \times \pi \times [(d + r)^3 - r^3] + \rho_{\text{Fe}_3\text{O}_4} \times \frac{4}{3} \times \pi \times r^3} = 2.1$$

$$\frac{1.2 \times \frac{4}{3} \times \pi \times [(x + 16.5 + 5)^3 - (16.5 + 5)^3]}{2 \times \frac{4}{3} \times \pi \times [(16.5 + 5)^3 - 5^3] + 5 \times \frac{4}{3} \times \pi \times 5^3} = 2.1$$

Solving the simple equation,  $x=14$  nm. This calculation neglects the thickness of the initiator (less than 0.5 nm based on TGA data).

### **Calculation of the Mass of Protein in a BSA monolayer on a SiO<sub>2</sub>-Fe<sub>3</sub>O<sub>4</sub> Particle with a Diameter of 43 nm**

To calculate the mass of a BSA monolayer on a SiO<sub>2</sub>-Fe<sub>3</sub>O<sub>4</sub> Particle (43 nm in diameter), we assume that a 4 nm thick BSA monolayer<sup>1</sup> ( $d_{BSA}$ ) forms on the outside of a single bead with a surface area of  $S_{bead}$ . (The assumption of a monolayer thickness of 4 nm and a film density of 1 g/cm<sup>3</sup> may be a slight overestimation because of incomplete packing.)

$$\begin{aligned} m_{bead} &= m_{silica} + m_{Fe_3O_4} = \rho_{SiO_2} \times V_{SiO_2} + \rho_{Fe_3O_4} \times V_{Fe_3O_4} \\ &= \frac{4}{3} \times \pi \times \{ \rho_{SiO_2} \times [(d + r)^3 - (r)^3] + \rho_{Fe_3O_4} \times r^3 \} \\ &= \frac{4}{3} \times \pi \times \{ 2 \times [(21.5e - 7)^3 - (5e - 7)^3] + 5 \times (5e - 7)^3 \} \\ &= (8.5e - 17)g \end{aligned}$$

$$\begin{aligned} m_{monolayerBSA/bead} &= \rho_{BSA} \times d_{BSA} \times S_{bead} = \rho_{BSA} \times d_{BSA} \times 4\pi \times (d + r)^2 \\ &= 1 \times (4e - 7) \times 4 \times \pi \times (21.5e - 7)^2 \\ &= (2.3e - 17)g \end{aligned}$$

### **Calculation of the mass of a fully modified bead**

The above calculations show that the mass of a single SiO<sub>2</sub>-Fe<sub>3</sub>O<sub>4</sub> particle is 8.5 x 10<sup>-17</sup> g. The TGA data in Table S1 show that there are 2.1 g of polymer per g of initiator-modified SiO<sub>2</sub>-Fe<sub>3</sub>O<sub>4</sub>. Assuming complete derivatization of each PHEMA

repeat unit with SA and aminobutyl NTA-Cu<sup>2+</sup>, the molar mass of the repeat unit will increase from 130 to 538 g/mol. Thus, after modification there will be 8.7 g of Cu<sup>2+</sup>-NTA-SA-PHEMA per g of initiator-SiO<sub>2</sub>-Fe<sub>3</sub>O<sub>4</sub>. Hence, neglecting the initiator mass, which should be negligible, a single, fully modified bead will have a mass of 8.2 x 10<sup>-16</sup> g. (Note that we neglect the initiator in part because its TGA data are difficult to interpret as the silane will become part of the residue.)

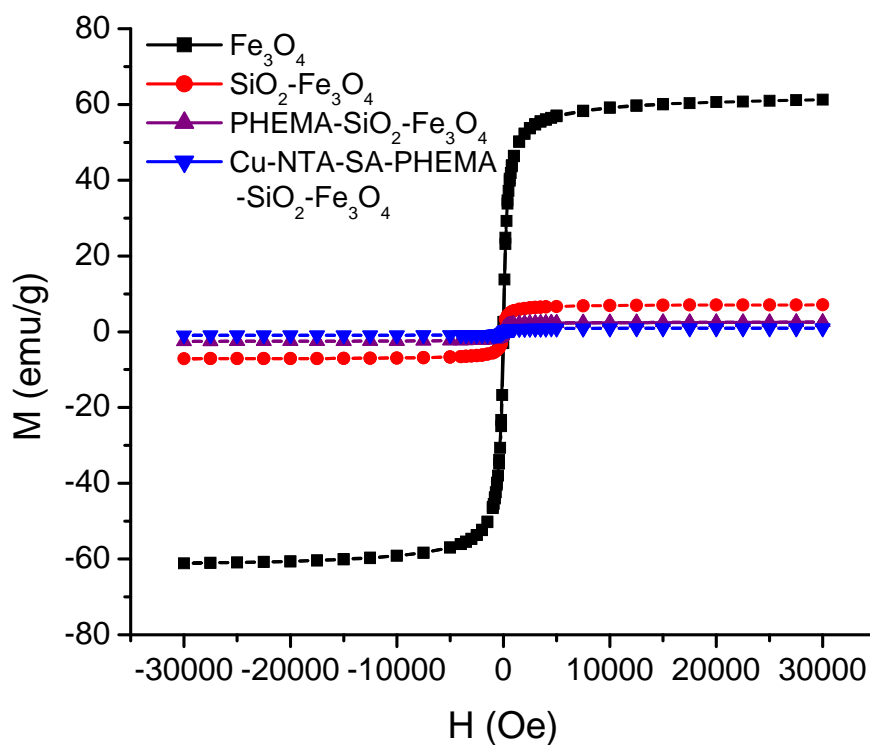

**Figure S4.** Magnetization curves for Fe<sub>3</sub>O<sub>4</sub> (Black), SiO<sub>2</sub>-Fe<sub>3</sub>O<sub>4</sub> (red), PHEMA-SiO<sub>2</sub>-Fe<sub>3</sub>O<sub>4</sub> (purple), and Cu<sup>2+</sup>-NTA-SA-PHEMA-SiO<sub>2</sub>-Fe<sub>3</sub>O<sub>4</sub> (blue) nanoparticles.

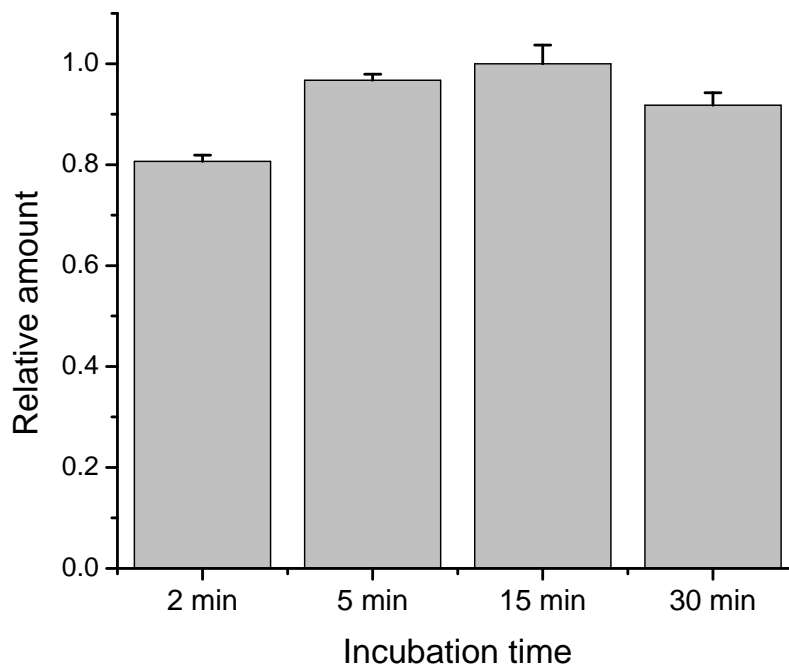

**Figure S5.** Bradford assay analysis of the amount of His-CRALBP eluted from  $\text{Ni}^{2+}$ -NTA-SA-PHEMA- $\text{SiO}_2$ - $\text{Fe}_3\text{O}_4$  beads after incubation of the beads in a cell lysate for various times. (The beads were washed prior to elution.) The amounts are normalized to the concentration with the 15-min incubation, and the error bars are the standard deviations of three measurements of the concentration in a single experiment.



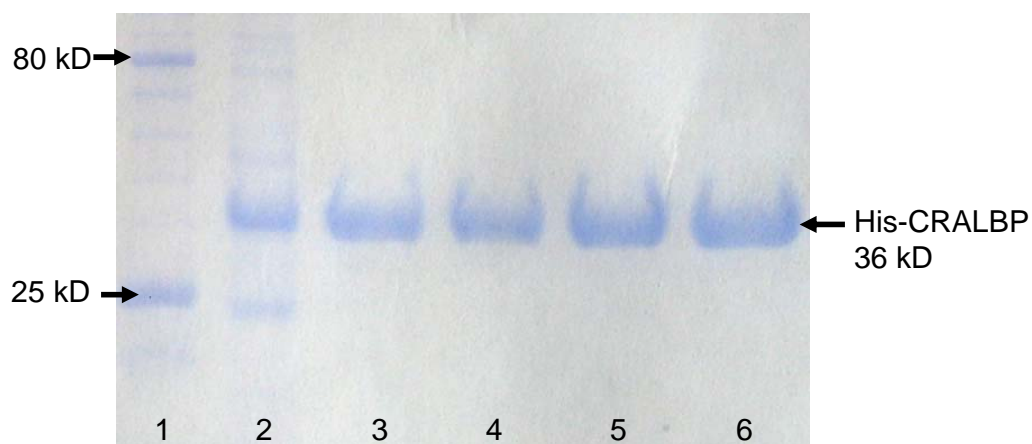

**Figure S6.** SDS-PAGE analysis (Coomassie staining) of a cell lysate containing overexpressed His-tagged CRALBP before (lane 2) and after (lane 3-6) purification through adsorption on  $\text{Ni}^{2+}$ -NTA-SA-PHEMA- $\text{SiO}_2$ - $\text{Fe}_3\text{O}_4$  beads with various incubation times (lane 3: 2 min; lane 4: 5 min; lane 5: 15 min; lane 6: 30 min). Prior to analysis, the purified protein was eluted from washed beads using 0.5 M imidazole in buffer. Lane 1 shows a standard protein ladder.

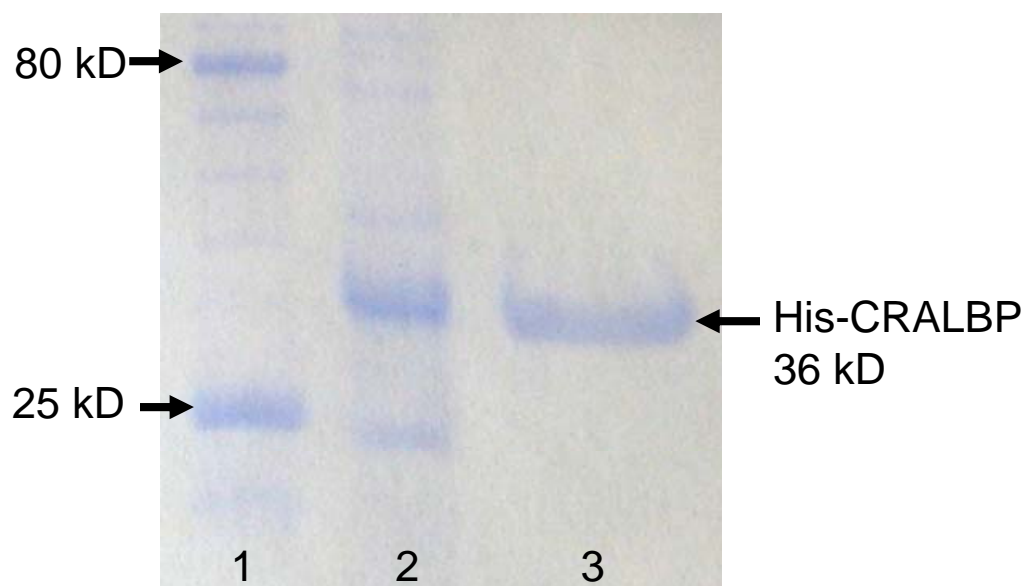

**Figure S7.** SDS-PAGE analysis (Coomassie staining) of a cell lysate containing overexpressed His-tagged CRALBP before (lane 2) and after (lane 3) purification using Ni<sup>2+</sup>(reloaded)-NTA-SA-PHEMA-SiO<sub>2</sub>-Fe<sub>3</sub>O<sub>4</sub> beads. Prior to analysis, the purified protein was eluted from washed beads using 0.5 M imidazole in buffer. Lane 1 shows a standard protein ladder.

- (1) Tsuneda, S.; Saito, K.; Furusaki, S.; Sugo, T. *J. Chromatogr., A* **1995**, *689*, 211-218.
